# Supplementary material
Source: PubMed Central journal article supplement (PMC4229409)
Supplement: NIHMS599138-supplement-Supplementary_Materials__Study_Instruments.pdf [file NIHMS599138-supplement-Supplementary_Materials__Study_Instruments.pdf]

## Fall Harm Risk Screen

For each question, circle all that apply. Enter total number of 'Yes' responses below. Locate corresponding level of fall risk; implement appropriate interventions for risk level as described in hospital policy.

**1. Does the patient need assistance?**

- No
- Yes standing
- Yes toileting
- Yes walking
- Attempts to get OOB when assistance is needed

**2. Has the patient fallen in last 6 months?**

- No
- Yes, past 6 months increased risk
- Yes, past 6 months but no increased risk
- Unable to determine

**3. Is there a risk for fall based on other clinical factors or on your nursing judgment ?**

- No
- Yes at risk based on clinical indicators
- Yes, advanced age
- Yes, multiple meds (new meds; benzodiazepines; antihypertensives)
- Yes, risk of bone fracture
- Yes, anticoagulant therapy
- Yes, pre existing condition affecting sensation function
- Yes, pre existing condition affecting cognitive function
- Yes, pre existing condition affecting mobility
- Yes, postoperative status

**TOTAL NUMBER OF 'YES' RESPONSES** \_\_\_\_\_

**Level of Fall Risk**

**Low Fall Risk/Universal Fall Risk Precautions:** total score = 0 'yes' responses

**Level 1 Fall Risk:** total score = 1 'yes' response

**Level 2 Fall Interventions:** total score = 2 or more 'yes' responses, *or* **any** 'yes' response to item 3 (nursing judgment).

## Stroke Assessment of Fall Risk

For each item, circle the number in the FALL RISK SCORE column that corresponds with the patient Impairment and Functional Activity information. Sum the Impairments and the Functional Activities to obtain the Fall Risk Score.

| Risk Domain                      | FALL RISK SCORE  |                |
|----------------------------------|------------------|----------------|
|                                  | Score            | (circle score) |
| <b>IMPAIRMENTS</b>               |                  |                |
|                                  |                  |                |
| • <b>Impulsivity</b>             |                  |                |
| Present                          | Yes              | 7              |
| Absent                           | No               | 0              |
|                                  |                  |                |
| • <b>Hemi-neglect</b>            |                  |                |
| Present                          | Yes              | 7              |
| Absent                           | No               | 0              |
|                                  |                  |                |
| • <b>Static sitting balance</b>  | Normal or Good + | 0              |
|                                  | Good             | 1              |
|                                  | Good -           | 2              |
|                                  | Fair +           | 3              |
|                                  | Fair             | 4              |
|                                  | Fair -           | 5              |
|                                  | Poor +           | 6              |
|                                  | Poor             | 7              |
|                                  |                  |                |
| • <b>Dynamic sitting balance</b> | Normal or Good + | 0              |
|                                  | Good             | 1              |
|                                  | Good -           | 2              |
|                                  | Fair +           | 3              |
|                                  | Fair             | 4              |
|                                  | Fair -           | 5              |
|                                  | Poor +           | 6              |
|                                  | Poor             | 7              |
|                                  |                  |                |
| <b>Subtotal, Impairments</b>     |                  |                |

| Risk Domain                            | FALL RISK SCORE |                |
|----------------------------------------|-----------------|----------------|
|                                        | Score           | (circle score) |
| <b>FUNCTIONAL ACTIVITIES</b>           |                 |                |
|                                        |                 |                |
| • <b>Lowest transfer FIM tested</b>    | 7               | 1              |
|                                        | 6               | 2              |
|                                        | 5               | 3              |
|                                        | 4               | 4              |
|                                        | 3               | 5              |
|                                        | 2               | 6              |
|                                        | 1 or 0          | 7              |
|                                        |                 |                |
| • <b>Problem Solving FIM</b>           | 7               | 1              |
|                                        | 6               | 2              |
|                                        | 5               | 3              |
|                                        | 4               | 4              |
|                                        | 3               | 5              |
|                                        | 2               | 6              |
|                                        | 1 or 0          | 7              |
|                                        |                 |                |
| • <b>Memory FIM</b>                    | 7               | 1              |
|                                        | 6               | 2              |
|                                        | 5               | 3              |
|                                        | 4               | 4              |
|                                        | 3               | 5              |
|                                        | 2               | 6              |
|                                        | 1 or 0          | 7              |
|                                        |                 |                |
| <b>Subtotal, Functional Activities</b> |                 |                |
|                                        |                 |                |
| <b><u>TOTAL FALL RISK SCORE</u></b>    |                 |                |
